# Supplementary material for: Analyzing Spatial Dependence of Rice Production in Northeast Thailand for Sustainable Agriculture: An Optimal Copula Function Approach
Source: MDPI journal article supplement (doi:10.3390/su152014774), 2023-10-11
Supplement: s1 [file s1]

## Supplementary Material :

# Analyzing Spatial Dependence of Rice Production in Northeast Thailand for Sustainable Agriculture: An Optimal Copula Function Approach

Suneerat Srisopa <sup>1</sup>, Peerapong Luamka <sup>2</sup>, Saowanee Rattanawan <sup>3</sup>,  
Khanitta Somtrakoon <sup>4</sup>, and Piyapatr Busababodhin <sup>3,5,\*</sup>

<sup>1</sup> Department of Mathematics, Faculty of Education, The Eastern University of Management and Technology,  
Ubon Ratchathani 34000, Thailand

<sup>2</sup> Regional Office of Agricultural Economics Section 4, Tha Phra, Mueang, Khon Kaen 40000, Thailand

<sup>3</sup> Department of Mathematics, Faculty of Science, Mahasarakham University, Kantharawichai,  
Maha Sarakham 44150, Thailand

<sup>4</sup> Department of Biology, Faculty of Science, Mahasarakham University, Kantharawichai,  
Maha Sarakham 44150, Thailand

<sup>5</sup> DSSA Research Unit, Faculty of Science, Mahasarakham University, Kantharawichai, Maha Sarakham 44150,  
Thailand

\* Correspondence: piyapatr.b@msu.ac.th; Tel.: +66-92-542-6396

## 1. Area Summary

Northeast Thailand encompasses the flat to undulating lands of the Khorat Plateau between the Phetchabun Range in the west and the Mekong River in the east. These lands are conventionally classified into high, middle, and low terraces, with different susceptibilities to drought and flood and hence different suitabilities for rice and field crops. Most of the arable soils in the Plateau are sandy, acidic, and infertile, comprising mainly quartz and kaolinite from highly weathered parent materials. Originally covered with monsoonal dipterocarp forests, progressive clearing for farming has led to a decline in soil organic matter and mineral nutrients and an increase in soil acidity. Much of the arable land is also salt-affected to varying degrees—strongly in the hilly to undulating regions in the west and weakly in the flat low-lying areas along the Mun and Chi Rivers.

There are twenty provinces in the Northeast, Thailand. They belong to three watersheds or main rivers, Khong, Chi and Mun. Their details are as in Table S1 and Figure S1.

**Table S 1** Provinces in the Northeast regions which belong to main watershed.

| Watershed Name | Province          |
|----------------|-------------------|
| Khong          | Loei              |
|                | Nong Bua Lamphu   |
|                | Udon Thani        |
|                | Nong Khai         |
|                | Beung Kan         |
|                | Sakon Nakhon      |
|                | Nakhon Phanom     |
|                | Mukdahan          |
| Chi            | Amnat Charoen     |
|                | Khon Kaen         |
|                | Maha Sarakham     |
|                | Roi Et            |
|                | Kalasin           |
| Mun            | Yasothon          |
|                | Chaiyaphum        |
|                | Nakhon Ratchasima |
|                | Buriram           |
|                | Surin             |
|                | Sisaket           |
|                | Ubon Ratchathani  |

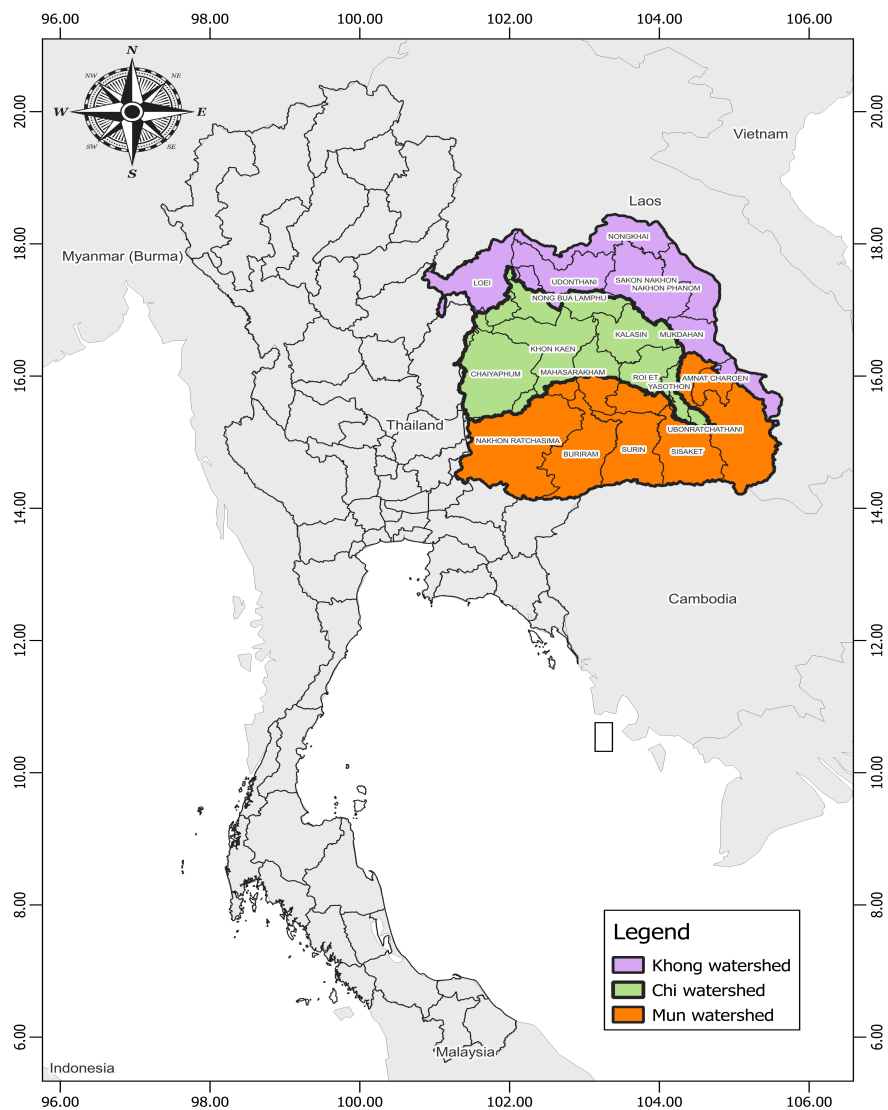

**Figure S 1** The map of provinces in the Northeast regions which belong to main watershed.

## 2. Data Summary

The summary of crops data, cultivated area (ha), harvested area (ha), productivities (ton) and yield(kg) per ha, in the Northeast regions during 1991-2021 are shown in Table S2 - S5, respectively.

**Table S 2** Summary of cultivated area (ha) in the Northeast regions in selected years.

| Province          | Min       | Average   | Max       | skewness | kurtosis |
|-------------------|-----------|-----------|-----------|----------|----------|
| Kalasin           | 537,796   | 1,263,580 | 1,604,208 | -0.97    | 5.41     |
| Khon Kaen         | 1,491,156 | 2,107,690 | 2,704,124 | -0.21    | 2.05     |
| Chaiyaphum        | 562,899   | 1,346,462 | 1,835,990 | -0.24    | 3.19     |
| Nakhon Phanom     | 778,199   | 1,106,682 | 1,479,789 | 0.47     | 2        |
| Nakhon Ratchasima | 1,879,743 | 3,119,621 | 3,889,701 | -0.82    | 3.79     |
| Beung Kan         | 480,528   | 500,391   | 561,850   | 1.6      | 3.69     |
| Buriram           | 1,839,593 | 2,734,872 | 3,217,615 | -1.3     | 7.52     |
| Maha Sarakham     | 1,148,559 | 1,794,322 | 2,253,259 | -0.33    | 2.53     |
| Mukdahan          | 228,429   | 385,658   | 492,320   | 0.2      | 2.08     |
| Yasothon          | 710,426   | 1,117,988 | 1,367,528 | 0.15     | 2.9      |
| Roi Et            | 2,061,733 | 2,668,835 | 3,222,284 | 0.06     | 2.08     |
| Loei              | 265,016   | 393,926   | 455,577   | -1.18    | 3.67     |
| Sisaket           | 1,786,767 | 2,492,575 | 3,201,512 | 0.4      | 1.8      |
| Sakon Nakhon      | 1,024,110 | 1,785,697 | 2,236,939 | -0.4     | 3.52     |
| Surin             | 1,497,532 | 2,783,108 | 3,301,794 | -1.59    | 6.35     |
| Nong Khai         | 465,700   | 933,689   | 1,276,298 | -0.68    | 1.93     |
| Nong Bua Lamphu   | 647,685   | 823,122   | 953,324   | -0.35    | 1.65     |
| Amnat Charoen     | 853,534   | 958,035   | 1,074,427 | 0.23     | 2.24     |
| Udon Thani        | 1,682,081 | 2,147,493 | 3,033,845 | 0.89     | 2.46     |
| Ubon Ratchathani  | 2,891,807 | 3,544,253 | 4,314,831 | 0.14     | 2.01     |

**Table S 3** Summary of harvested area (ha) in the Northeast regions in selected years.

| Province          | Min       | Average   | Max       | skewness | kurtosis |
|-------------------|-----------|-----------|-----------|----------|----------|
| Kalasin           | 526,968   | 1,191,222 | 1,516,504 | -0.75    | 5.08     |
| Khon Kaen         | 1,206,504 | 1,886,594 | 2,470,815 | -0.44    | 2.60     |
| Chaiyaphum        | 504,535   | 1,179,523 | 1,718,665 | -0.11    | 3.52     |
| Nakhon Phanom     | 557,410   | 1,010,922 | 1,473,189 | 0.34     | 2.56     |
| Nakhon Ratchasima | 1,730,854 | 2,792,024 | 3,448,251 | -0.8     | 3.16     |
| Beung Kan         | 407,529   | 455,976   | 485,152   | -0.48    | 2.20     |
| Buriram           | 1,786,980 | 2,553,609 | 2,987,172 | -0.93    | 4.36     |
| Maha Sarakham     | 1,069,139 | 1,635,388 | 2,095,471 | -0.18    | 2.41     |
| Mukdahan          | 178,753   | 366,835   | 485,382   | -0.03    | 2.70     |
| Yasothon          | 679,849   | 1,043,662 | 1,300,388 | 0.04     | 3.54     |
| Roi Et            | 2,009,837 | 2,441,921 | 2,985,251 | 0.32     | 2.14     |
| Loei              | 228,743   | 371,510   | 439,606   | -0.96    | 3.31     |
| Sisaket           | 1,602,726 | 2,378,476 | 3,071,352 | 0.29     | 1.90     |
| Sakon Nakhon      | 823,003   | 1,668,439 | 2,210,028 | -0.38    | 3.91     |
| Surin             | 1,428,146 | 2,633,325 | 3,106,496 | -1.62    | 6.50     |
| Nong Khai         | 449,279   | 848,730   | 1,200,984 | -0.54    | 1.89     |
| Nong Bua Lamphu   | 621,582   | 763,880   | 903,048   | 0.08     | 1.53     |
| Amnat Charoen     | 842,106   | 916,653   | 1,067,209 | 0.85     | 3.01     |
| Udon Thani        | 1,551,505 | 2,023,943 | 3,017,958 | 1.02     | 2.90     |
| Ubon Ratchathani  | 2,588,008 | 3,385,282 | 4,163,693 | 0.09     | 1.91     |

**Table S 4** Summary of productivities(ton) in the Northeast regions in selected years.

| Province          | Min     | Average | Max       | skewness | kurtosis |
|-------------------|---------|---------|-----------|----------|----------|
| Kalasin           | 132,987 | 403,758 | 572,702   | -0.22    | 2.45     |
| Khon Kaen         | 308,047 | 574,822 | 830,166   | -0.26    | 1.94     |
| Chaiyaphum        | 101,656 | 381,358 | 646,020   | 0.15     | 2.61     |
| Nakhon Phanom     | 123,636 | 305,629 | 524,374   | 0.56     | 2.01     |
| Nakhon Ratchasima | 338,263 | 851,798 | 1,431,024 | -0.10    | 2.79     |
| Beung Kan         | 123,844 | 144,782 | 165,157   | -0.06    | 2.48     |
| Buriram           | 382,635 | 806,889 | 1,187,300 | -0.22    | 2.59     |
| Maha Sarakham     | 225,808 | 514,926 | 777,572   | -0.15    | 1.87     |
| Mukdahan          | 47,585  | 119,826 | 185,931   | 0.42     | 2.07     |
| Yasothon          | 114,509 | 312,005 | 482,904   | 0.32     | 2.21     |
| Roi Et            | 323,293 | 758,475 | 1,118,021 | -0.07    | 2.08     |
| Loei              | 74,106  | 145,701 | 198,299   | -0.57    | 4.33     |
| Sisaket           | 341,492 | 769,446 | 1,229,381 | 0.14     | 1.88     |
| Sakon Nakhon      | 206,334 | 498,748 | 756,201   | -0.05    | 2.14     |
| Surin             | 336,945 | 860,704 | 1,214,083 | -0.2     | 1.89     |
| Nong Khai         | 166,023 | 254,835 | 401,837   | 0.29     | 2.17     |
| Nong Bua Lamphu   | 194,148 | 245,059 | 348,114   | 0.76     | 3.15     |
| Amnat Charoen     | 211,013 | 290,514 | 383,946   | 0.19     | 2.37     |
| Udon Thani        | 156,796 | 594,182 | 793,994   | -1.18    | 6.62     |
| Ubon Ratchathani  | 485,860 | 959,868 | 1,436,095 | 0.37     | 1.99     |

**Table S 5** Summary of yield (kg) per ha in the Northeast regions in selected years.

| Province          | Min | Average | Max | skewness | kurtosis |
|-------------------|-----|---------|-----|----------|----------|
| Kalasin           | 235 | 335     | 395 | -0.50    | 2.05     |
| Khon Kaen         | 185 | 301     | 380 | -0.55    | 2.86     |
| Chaiyaphum        | 201 | 317     | 394 | -0.28    | 1.98     |
| Nakhon Phanom     | 190 | 294     | 397 | -0.07    | 2.06     |
| Nakhon Ratchasima | 192 | 300     | 415 | -0.18    | 2.21     |
| Beung Kan         | 288 | 318     | 382 | 1.88     | 6.41     |
| Buriram           | 214 | 314     | 421 | -0.22    | 1.96     |
| Maha Sarakham     | 186 | 308     | 392 | -0.48    | 1.83     |
| Mukdahan          | 186 | 320     | 405 | -0.22    | 2.19     |
| Yasothon          | 168 | 294     | 407 | -0.09    | 1.96     |
| Roi Et            | 154 | 307     | 389 | -0.53    | 2.10     |
| Loei              | 322 | 394     | 543 | 0.99     | 4.19     |
| Sisaket           | 171 | 318     | 401 | -0.45    | 2.26     |
| Sakon Nakhon      | 131 | 295     | 372 | -0.98    | 4.24     |
| Surin             | 217 | 324     | 409 | -0.30    | 1.52     |
| Nong Khai         | 220 | 308     | 379 | -0.07    | 1.81     |
| Nong Bua Lamphu   | 266 | 321     | 385 | 0.21     | 2.49     |
| Amnat Charoen     | 241 | 316     | 361 | -0.82    | 2.43     |
| Udon Thani        | 52  | 302     | 395 | -1.35    | 6.58     |
| Ubon Ratchathani  | 158 | 281     | 363 | -0.39    | 2.08     |
